# Supplementary material
Source: Springer Nature journal article supplement (https://www.springermedizin.de/resource/supplementary/12958_2009_711_MOESM10_ESM.pdf/9568658)

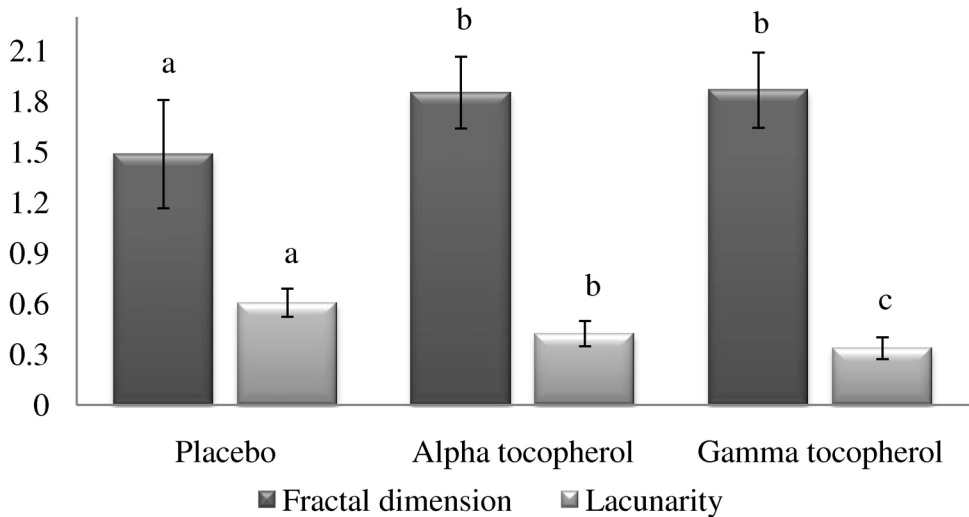

Supplement: MOESM10 [file 9568658]
